# Supplementary material for: Understanding the infection severity and epidemiological characteristics of mpox in the UK
Source: Springer Nature journal article supplement (doi:10.1038/s41467-024-45110-8), 2024-03-11
Supplement: MOESM1 [file 41467_2024_45110_MOESM1_ESM.pdf]

**Supplementary Tables and Figures**

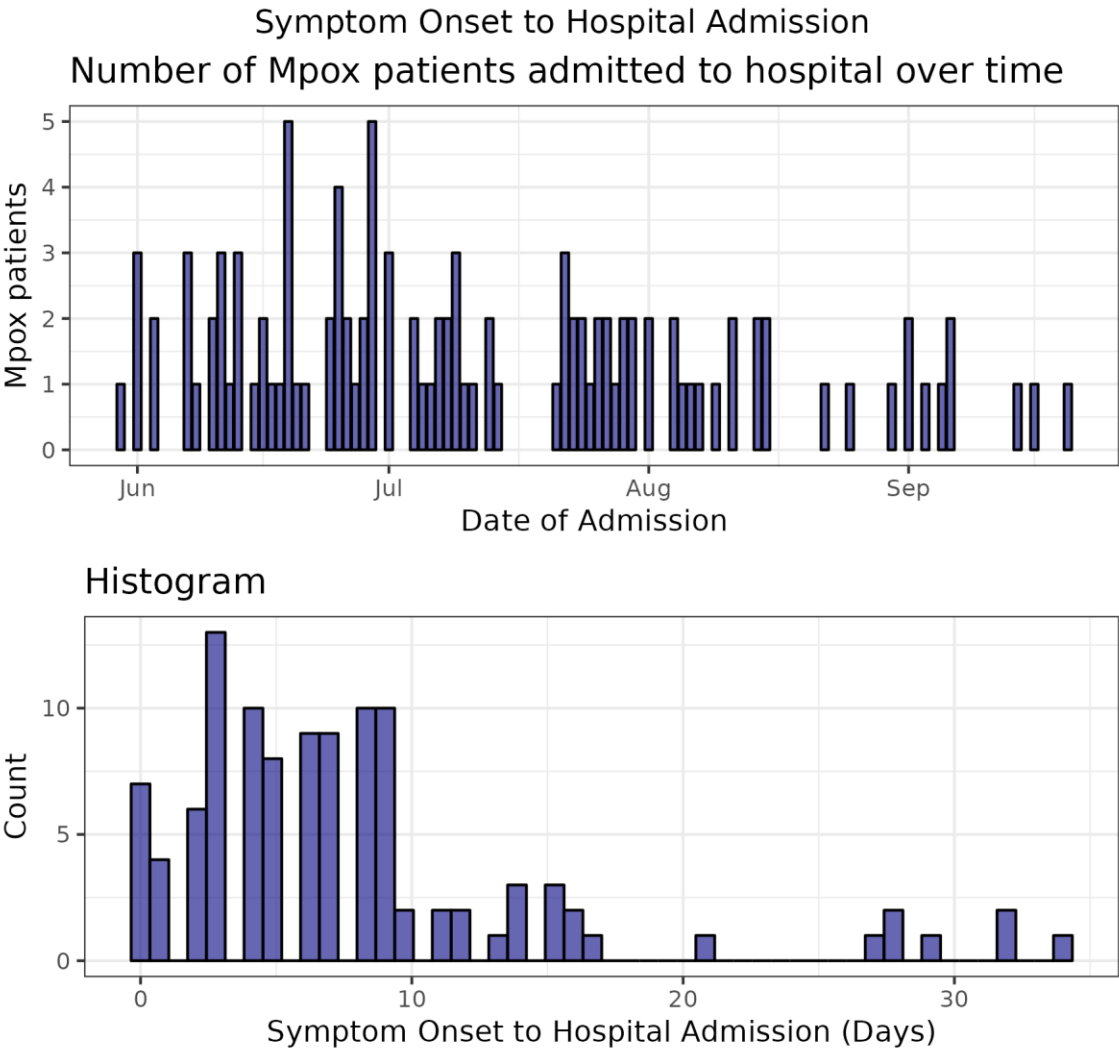

*Supplementary Figure 1: The hospital admission dates of patients with an mpox infection that had a symptom onset date and a histogram of the time between symptom onset and hospital admission.*

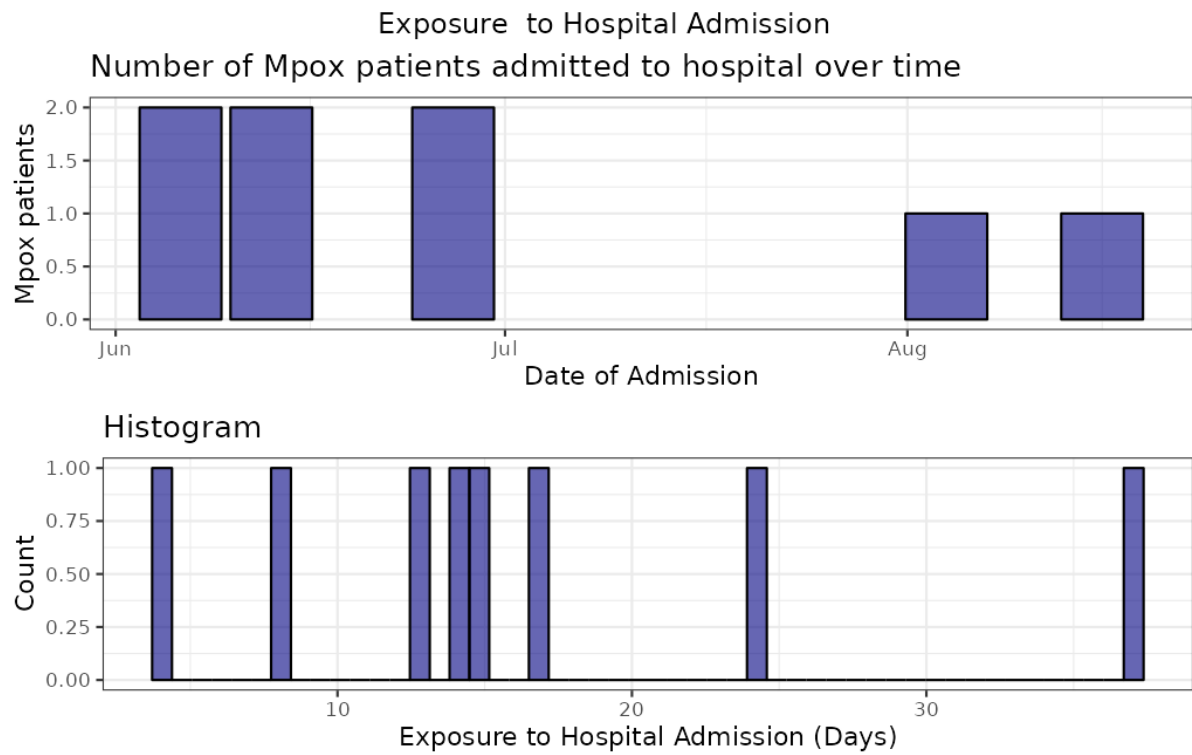

*Supplementary Figure 2: The hospital admission dates of patients with an mpox infection that had an exposure date and a histogram of the time between exposure and hospital admission.*

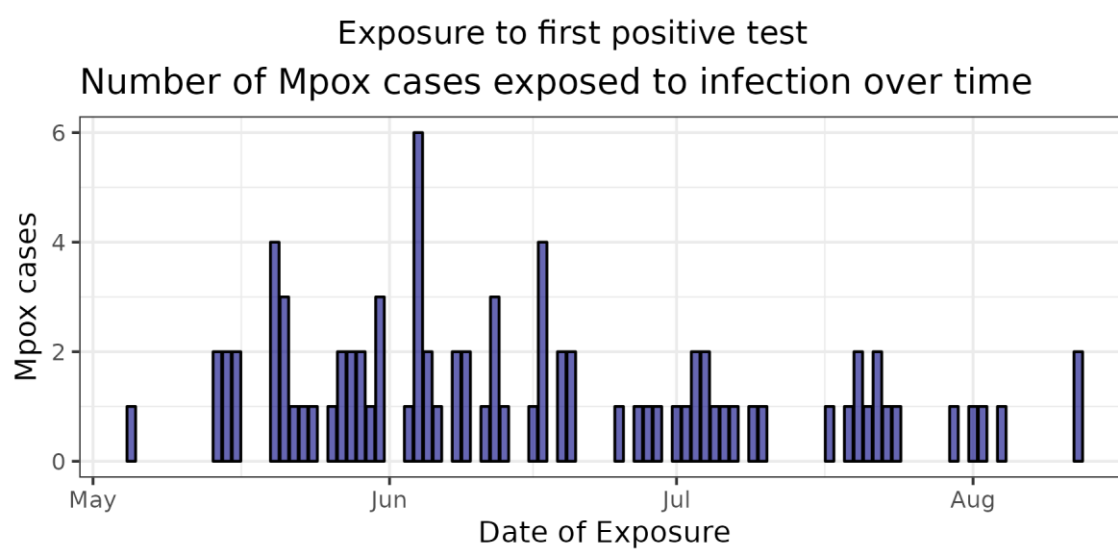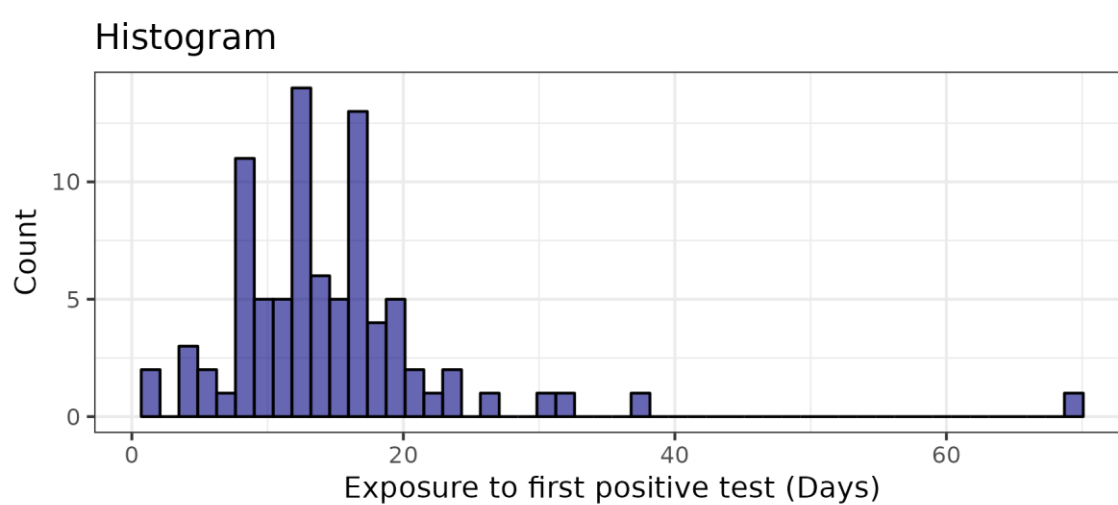

Supplementary Figure 3: The exposure dates of cases with an mpox infection that had both an exposure date and a specimen date, and a histogram of the time between exposure and first positive test.

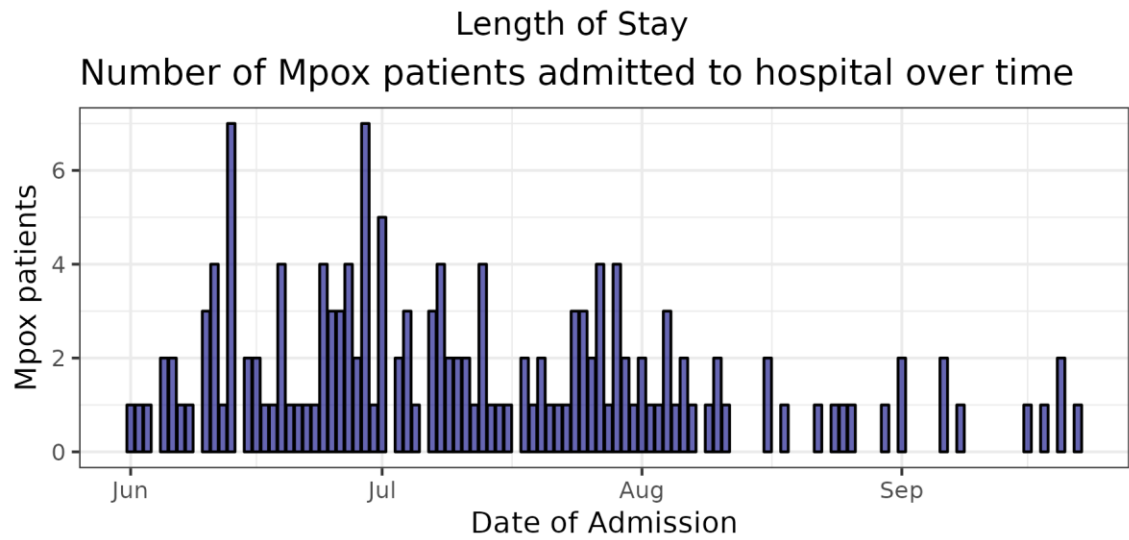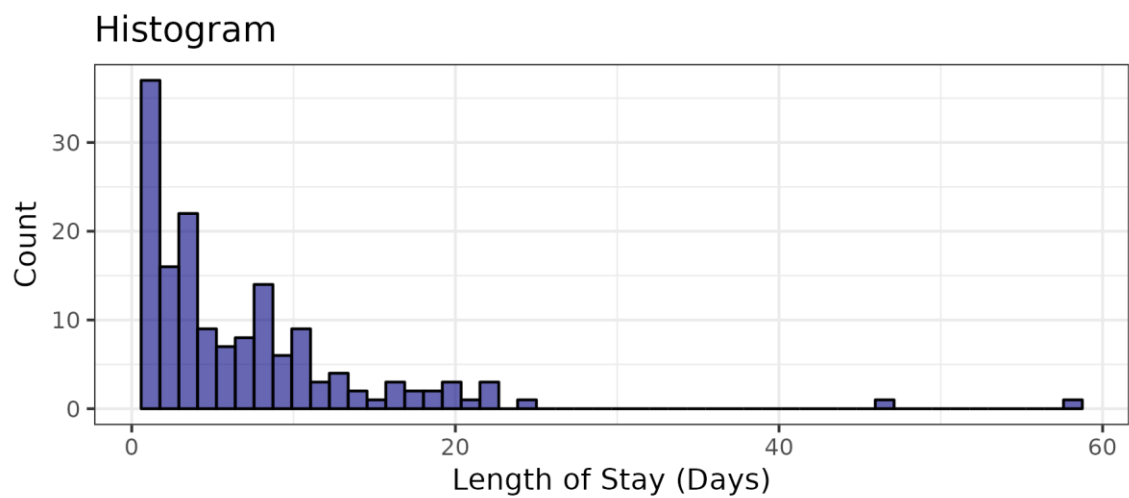

Supplementary Figure 4: The hospital admission dates of patients with an mpox infection and a histogram of the individual lengths of stay.

## LOO

|           | Length of Stay |      | Infection to Hospitalisation |      | Infection to first positive test |      |
|-----------|----------------|------|------------------------------|------|----------------------------------|------|
|           | RT             |      | RT                           |      | RT                               |      |
|           | Loo            | SE   | Loo                          | SE   | Loo                              | SE   |
| Lognormal | 910.4          | 29.0 | 788.0                        | 18.1 | 578.5                            | 19.2 |
| Weibull   | 915.9          | 28.9 | 807.5                        | 17.3 | 595.6                            | 32.7 |
| Gamma     | 915.1          | 28.8 | 796.0                        | 18.2 | 577.5                            | 23.7 |

Supplementary Table 1: Leave-one-out (LOO) cross validation scores for lognormal, Weibull and gamma distributions in each time delay model.

## Infection to Hospital Admission

| Infection to hospital admission |                                                                |                      |                    |                   |                      |                  |
|---------------------------------|----------------------------------------------------------------|----------------------|--------------------|-------------------|----------------------|------------------|
| N                               | Distribution                                                   | Mean                 | Standard Deviation | Shape/location    | Scale                | $\hat{R}$ (Mean) |
| 118                             | Doubly interval censored adjusted for right truncation gamma   | 14.96 (13.64, 16.28) | 7.02 (6.01, 8.20)  | 4.63 (3.45, 6.06) | 0.31 (0.23, 0.40)    | 1.00             |
| 118                             | Doubly interval censored adjusted for right truncation Weibull | 15.07 (13.72, 16.51) | 7.50 (6.64, 8.54)  | 2.13 (1.83, 2.44) | 17.00 (15.47, 18.63) | 1.00             |

Supplementary Table 2: Summary statistics of the time from infection to hospital admissions for an mpox case, fit from data including 118 patients using gamma and Weibull distributions.

| The cumulative distribution function estimates for the time from infection to hospital admissions |                    |                      |                      |                      |                      |
|---------------------------------------------------------------------------------------------------|--------------------|----------------------|----------------------|----------------------|----------------------|
| Distribution                                                                                      | 0.25 (CrI)         | 0.50 (CrI)           | 0.75 (CrI)           | 0.90 (CrI)           | 0.95 (CrI)           |
| Doubly interval censored with right truncation lognormal                                          | 9.70 (8.59, 10.77) | 13.33 (12.11, 14.58) | 18.23 (16.72, 20.14) | 24.29 (21.94, 27.44) | 28.79 (25.62, 33.21) |

Supplementary Table 3: The cumulative distribution function estimates for the time from infection to hospital admissions, fit to data from 118 cases using a lognormal distribution.

## Infection to First Positive Test

| Infection to first positive test |                                                                  |                      |                    |                   |                      |                  |
|----------------------------------|------------------------------------------------------------------|----------------------|--------------------|-------------------|----------------------|------------------|
| N                                | Distribution                                                     | Mean                 | Standard Deviation | Shape/location    | Scale                | $\hat{R}$ (Mean) |
| 86                               | Doubly interval censored adjusted for right truncation lognormal | 15.62 (13.96, 17.62) | 9.50 (7.48, 12.18) | 2.59 (2.49, 2.69) | 0.56 (0.48, 0.64)    | 1.00             |
| 86                               | Doubly interval censored adjusted for right truncation Weibull   | 15.24 (13.74, 16.86) | 8.65 (7.60, 9.96)  | 1.83 (1.62, 2.04) | 17.14 (15.43, 18.94) | 1.00             |

Supplementary Table 4: Summary statistics of the time from infection to first positive test for an mpox case, fit to data from 86 cases using lognormal and Weibull distributions.

| The cumulative distribution function estimates for the time from infection to first positive test |                    |                      |                      |                      |                      |
|---------------------------------------------------------------------------------------------------|--------------------|----------------------|----------------------|----------------------|----------------------|
| Distribution                                                                                      | 0.25 (CrI)         | 0.50 (CrI)           | 0.75 (CrI)           | 0.90 (CrI)           | 0.95 (CrI)           |
| Doubly interval censored with right truncation gamma                                              | 9.35 (8.23, 10.51) | 13.77 (12.36, 15.19) | 19.35 (17.67, 21.40) | 25.51 (23.17, 28.57) | 29.70 (26.80, 33.62) |

Supplementary Table 5: The cumulative distribution function estimates for the time from infection to first positive test, fit to data from 86 cases using a gamma distribution.

## Length of Stay

| Length of hospital stay |                                                                |                   |                    |                   |                   |                  |
|-------------------------|----------------------------------------------------------------|-------------------|--------------------|-------------------|-------------------|------------------|
| N                       | Distribution                                                   | Mean              | Standard Deviation | Shape/location    | Scale             | $\hat{R}$ (Mean) |
| 155                     | Doubly interval censored adjusted for right truncation gamma   | 6.92 (6.09, 7.86) | 6.76 (5.77, 7.87)  | 1.06 (0.88, 1.25) | 0.15 (0.12, 0.19) | 1.00             |
| 155                     | Doubly interval censored adjusted for right truncation Weibull | 6.89 (6.05, 7.81) | 6.90 (5.90, 8.12)  | 1.00 (0.90, 1.11) | 6.87 (5.95, 7.86) | 1.00             |

Supplementary Table 6: Summary statistics of the time of the length of stay in hospital for an mpox patient, fit to data from 155 patients using a lognormal distribution.

| The cumulative distribution function estimates for the length of hospital stay |                   |                   |                   |                      |                      |
|--------------------------------------------------------------------------------|-------------------|-------------------|-------------------|----------------------|----------------------|
| Distribution                                                                   | 0.25 (CrI)        | 0.50 (CrI)        | 0.75 (CrI)        | 0.90 (CrI)           | 0.95 (CrI)           |
| Doubly interval censored with right truncation lognormal                       | 1.97 (1.67, 2.33) | 4.03 (3.52, 4.60) | 8.21 (7.17, 9.49) | 15.55 (13.13, 18.58) | 22.84 (18.89, 28.12) |

Supplementary Table 7: The cumulative distribution function estimates for the length of hospital stay, fit to data from 155 patients using a lognormal distribution.

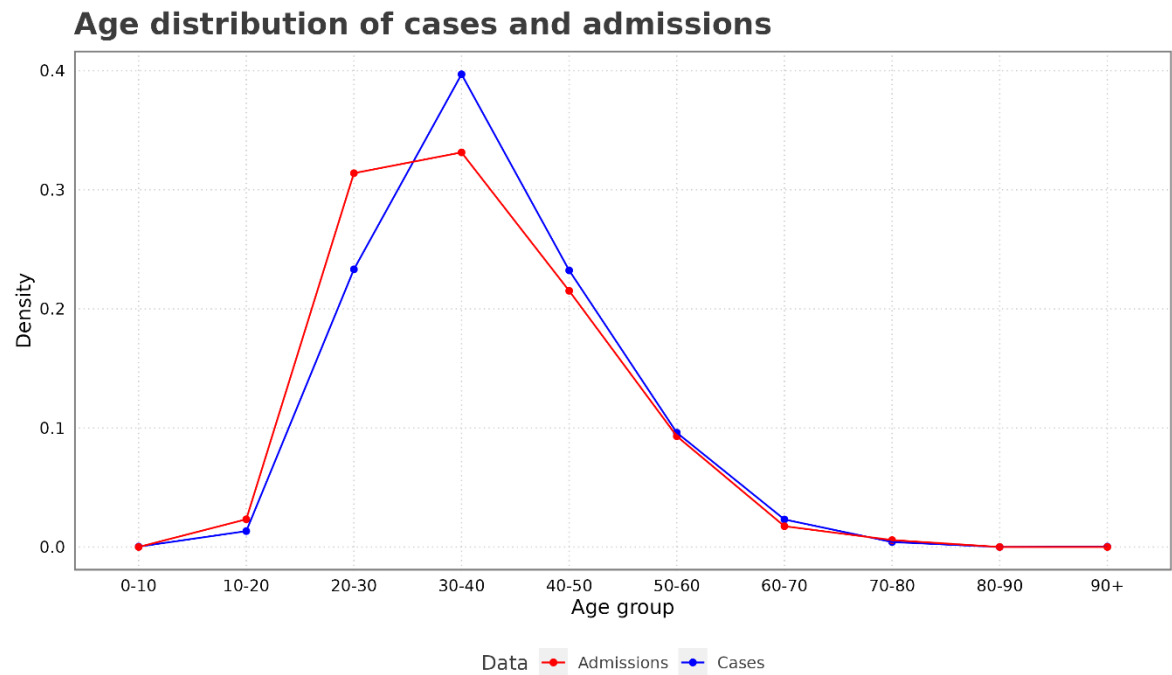

Supplementary Figure 5 A density plot of confirmed mpox RT-PCR cases and hospital admissions by age group.

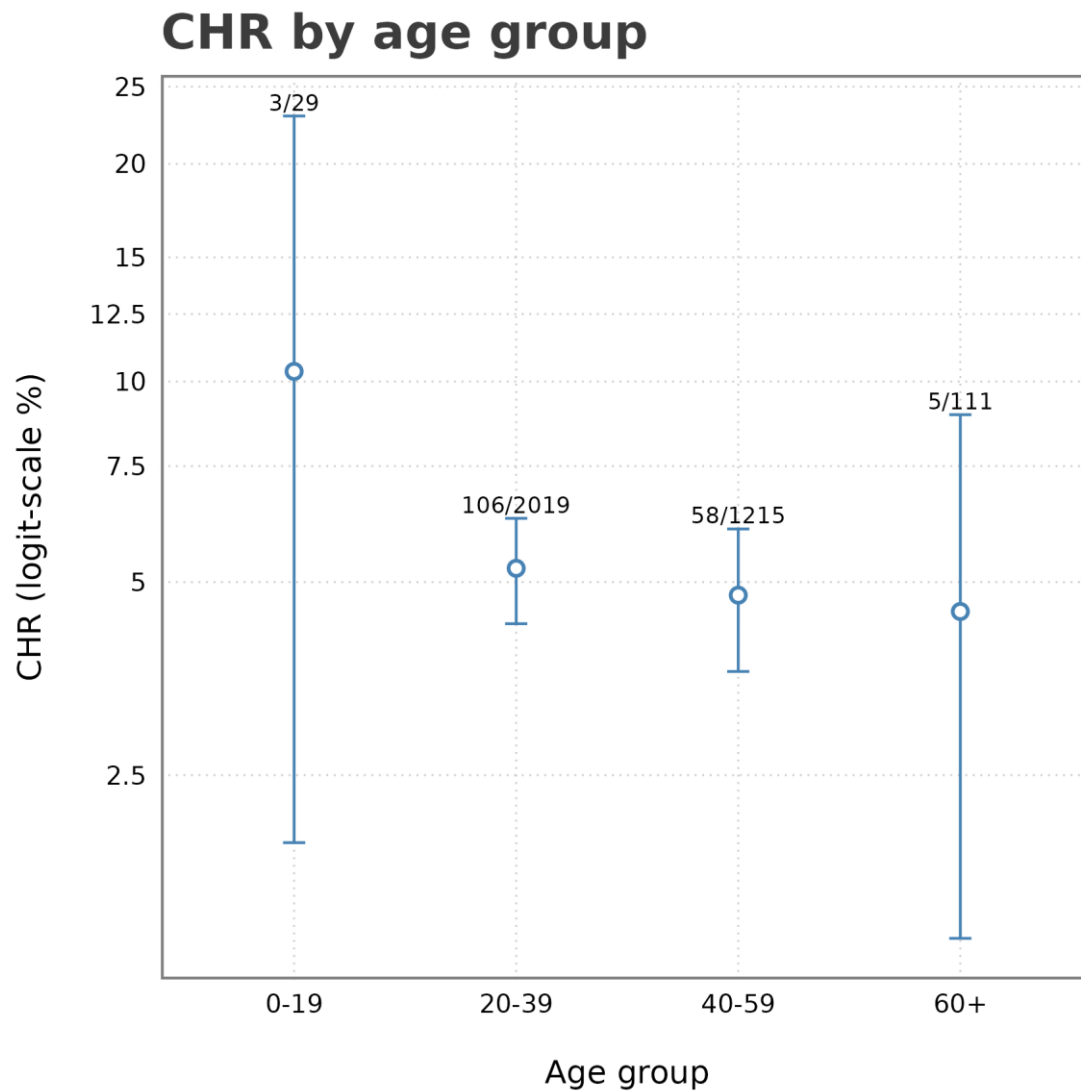

Supplementary Figure 6 The age-specific case hospitalisation risks with 95% binomial credible intervals.

| Case hospitalisation risk | Posterior Estimate (%)    |
|---------------------------|---------------------------|
| <i>Index cases</i>        | 8.47 (95% CI: 7.08, 9.97) |
| <i>Secondary cases</i>    | 4.54 (95% CI: 3.81, 5.25) |
| <i>Untraced cases</i>     | 4.77 (95% CI: 4.17, 5.43) |

Supplementary Table 8: Posterior estimates of the case hospitalisation risks, when assuming that untraced cases are a mixture of index and secondary cases.

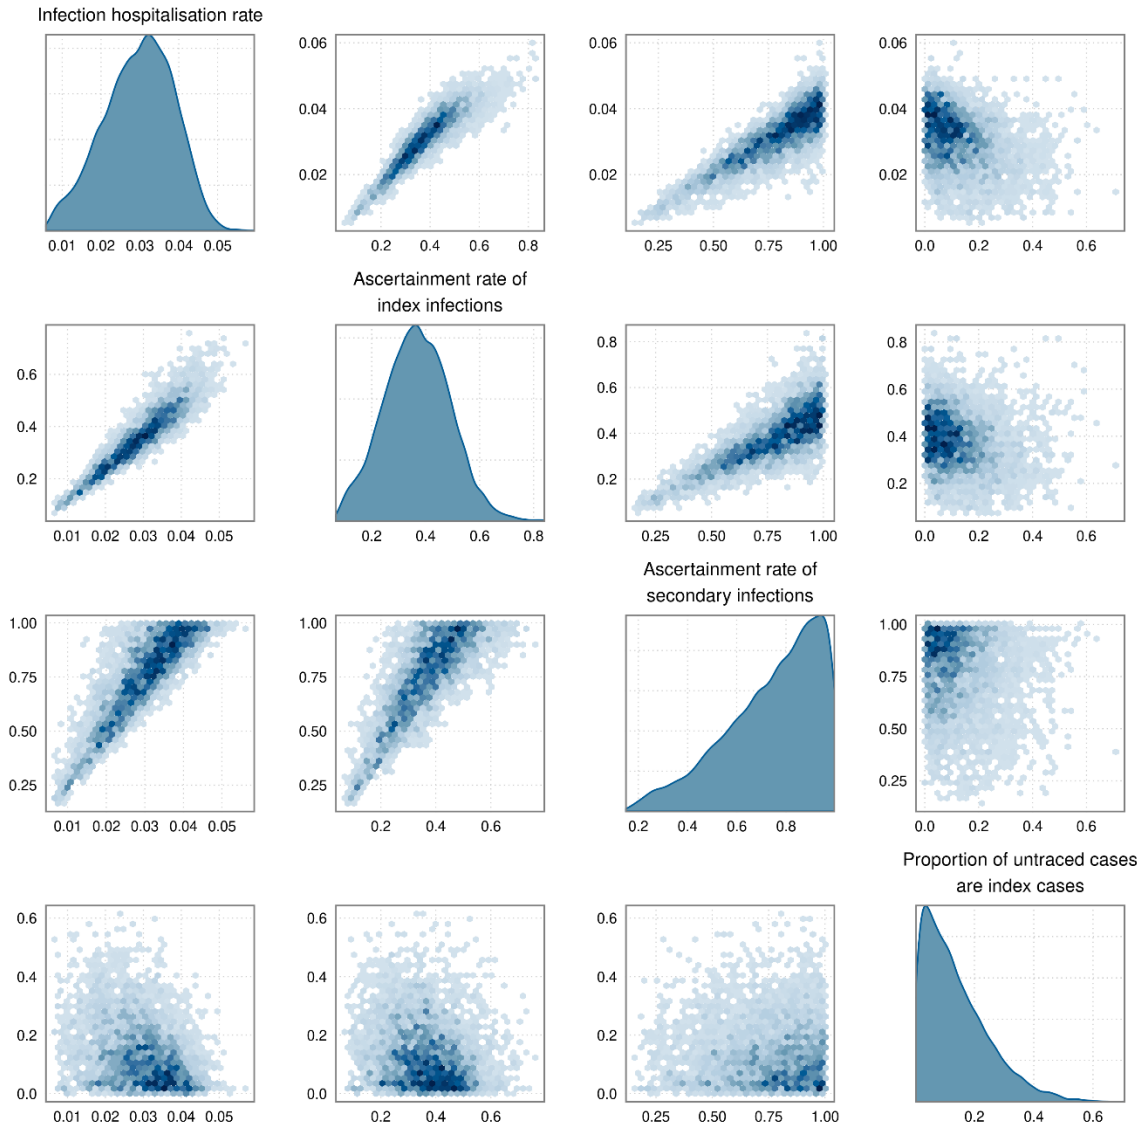

Supplementary Figure 7: The infection ascertainment prior distribution for key parameters of interest. These parameters are (in order), the infection hospitalisation risk, the probability of ascertaining non-hospitalised index/secondary infections, and the proportion of untraced cases that are estimated to be index cases. The diagonal plots are estimates of the posterior density, and the off-diagonal estimates are pairwise posterior density estimates.

| Parameter                                                    | Symbol                    | Posterior Estimate (%)       |
|--------------------------------------------------------------|---------------------------|------------------------------|
| Hospitalisation risk                                         | $p_h$                     | 4.13 (95% CI: 3.04, 5.02)    |
| Probability of ascertaining an index infection               | $\alpha_p(1 - p_h) + p_h$ | 49.13 (95% CI: 34.80, 63.95) |
| Probability of ascertaining a secondary infection            | $\alpha_s(1 - p_h) + p_h$ | 90.84 (95% CI: 70.18, 99.74) |
| Proportion of untraced infections that were index infections | $P(U = p)$                | 10.08 (95% CI: 0.31, 32.80)  |

Supplementary Table 9: Posterior estimates of our key quantities of interest.



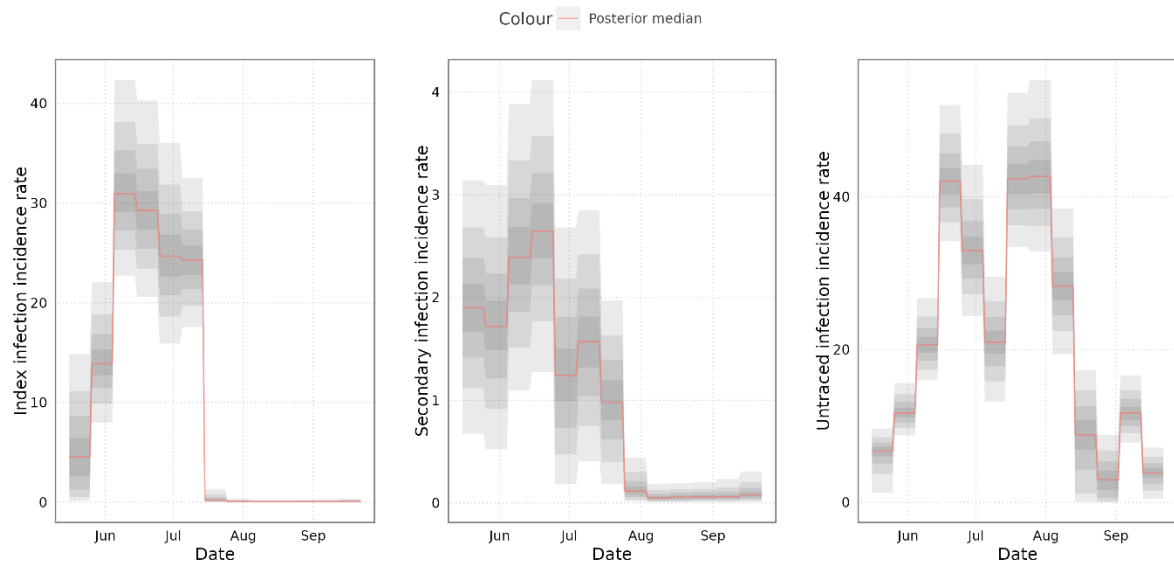

*Supplementary Figure 8: Expected incidence rate over time for the three subpopulations. Each panel displays the estimate of the incidence rate over time for a different subpopulation. The central red line displays the posterior median, and the grey shaded areas display the uncertainty in the estimate, with the lightest region displaying the 90% credible intervals. We estimate the incidence for 10-day intervals, which results in step changes in the incidence.*

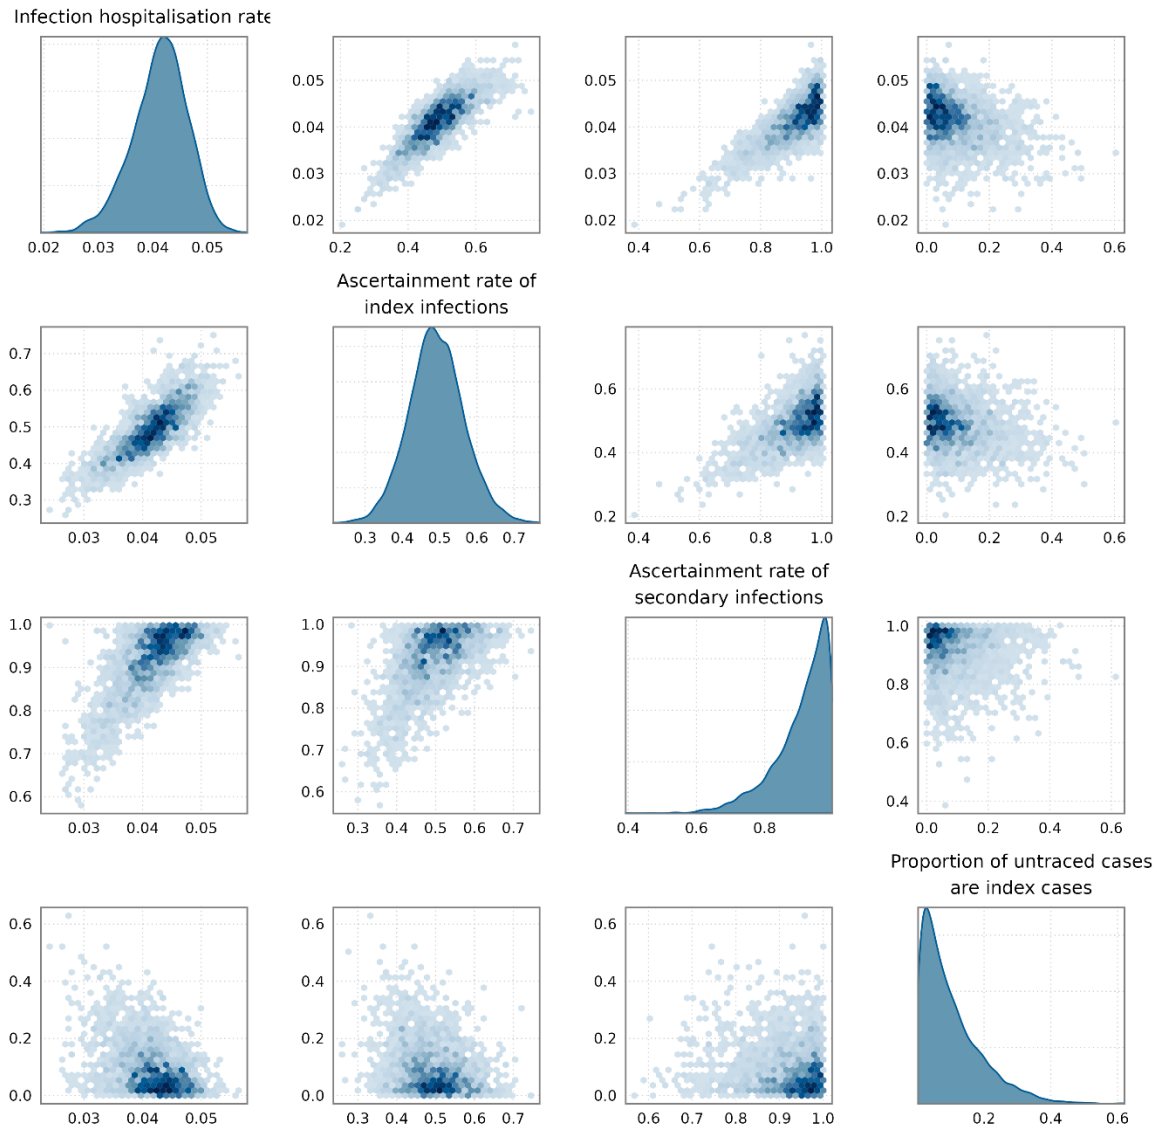

*Supplementary Figure 9: Visualisation of the posterior for key parameters of interest from fitting the incidence rate model. These parameters are (in order), the infection hospitalisation risk, the probability of ascertaining index/secondary cases, and the proportion of untraced cases that are estimated to be index cases. The diagonal plots are estimates of the posterior density, and the off-diagonal estimates are pairwise posterior density estimates.*

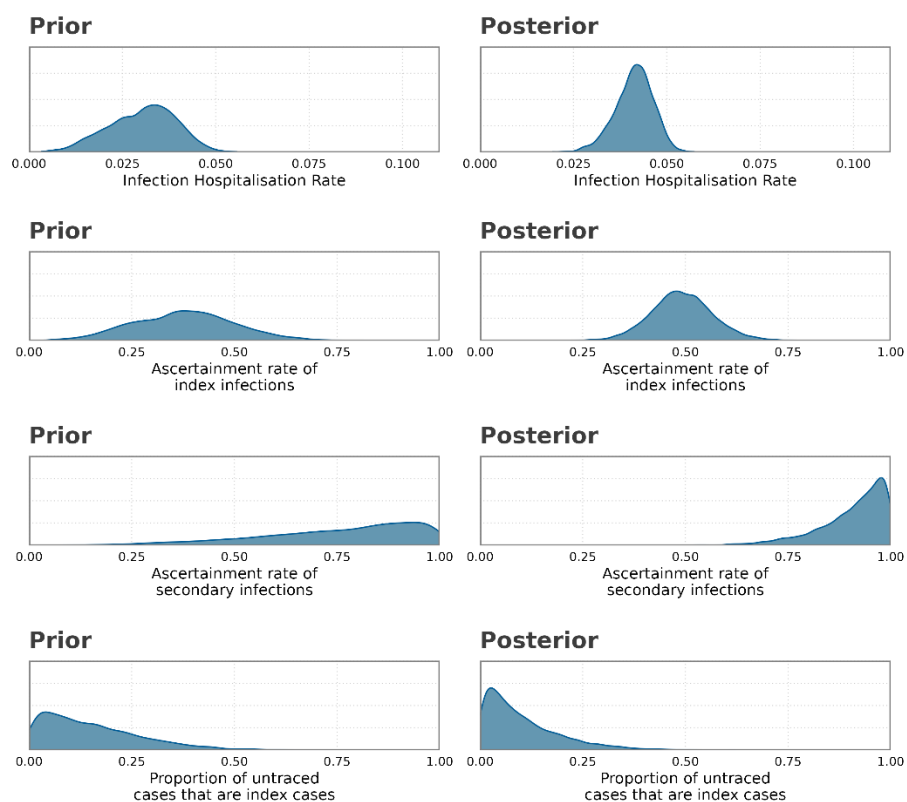

*Supplementary Figure 10: A comparison of the infection ascertainment prior distribution against the full model posterior obtained by fitting incidence over time and including untraced cases.*

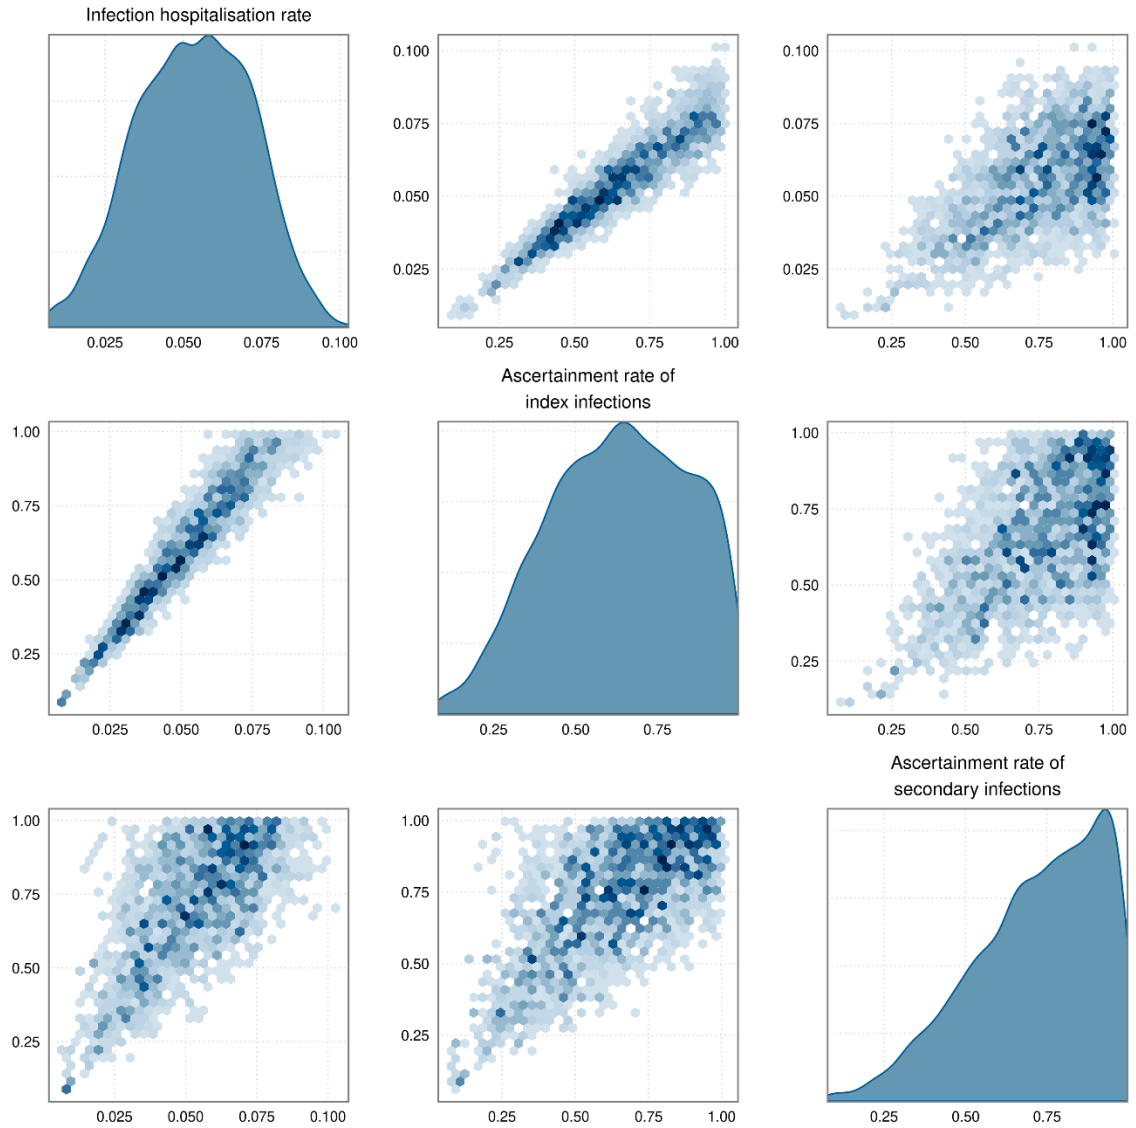

*Supplementary Figure 11: The infection ascertainment prior distribution for key parameters of interest, when the untraced group is omitted. These parameters are (in order), the infection hospitalisation risk, the probability of ascertaining non-hospitalised index/secondary infections, and the proportion of untraced cases that are estimated to be index cases. The diagonal plots are estimates of the posterior density, and the off-diagonal estimates are pairwise posterior densities estimates.*

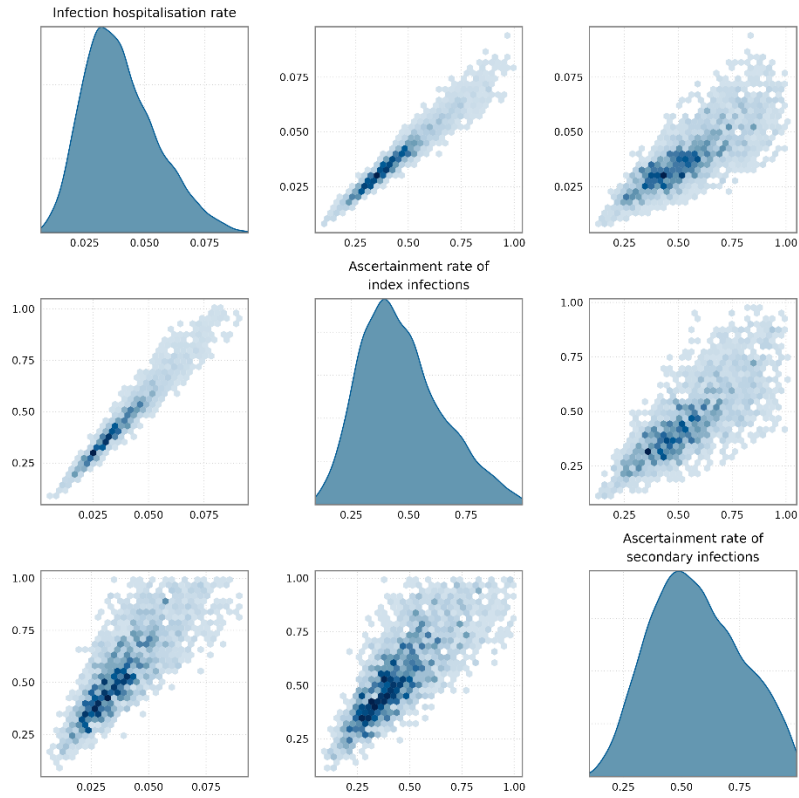

Supplementary Figure 12: Visualisation of the posterior for key parameters of interest obtained from fitting the incidence rate model with the untraced group omitted. These parameters are (in order), the infection hospitalisation risk, the probability of ascertaining index/secondary infections, and the proportion of untraced cases that are estimated to be index infections. The diagonal plots are estimates of the posterior density, and the off-diagonal plots are estimates of the pairwise posterior density.

| Parameter                                         | Symbol                    | Posterior Estimate (%)       |
|---------------------------------------------------|---------------------------|------------------------------|
| Probability of hospitalisation                    | $p_h$                     | 3.99 (95% CI: 1.62, 7.31)    |
| Probability of ascertaining index infection       | $\alpha_p(1 - p_h) + p_h$ | 46.97 (95% CI: 18.65, 86.96) |
| Probability of ascertaining a secondary infection | $\alpha_s(1 - p_h) + p_h$ | 56.48 (95% CI: 23.32, 94.06) |

Supplementary Table 10: Posterior estimates of our key quantities of interest, when the the untraced group is omitted.

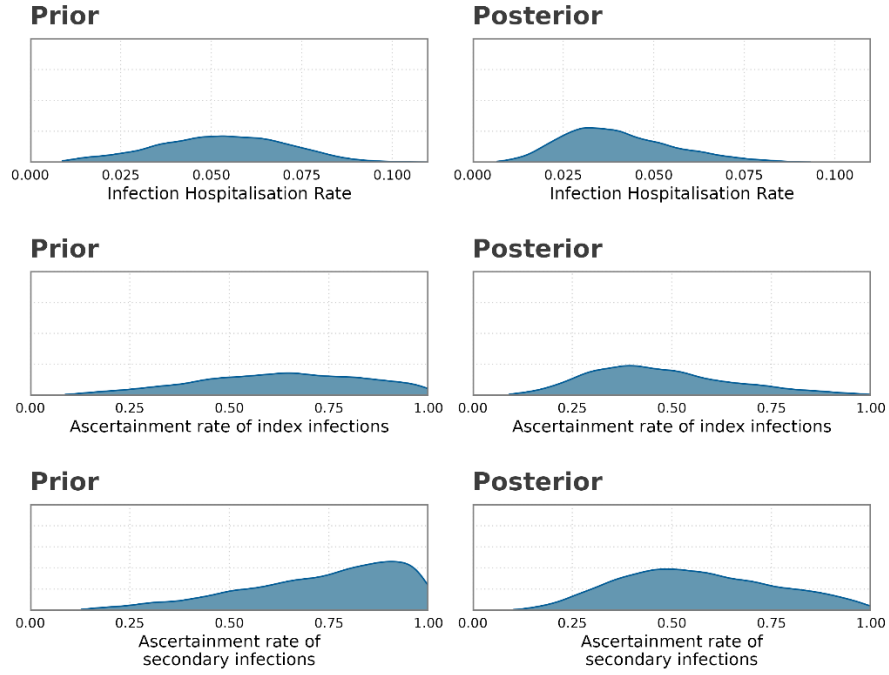

Supplementary Figure 13: Comparison of prior density of the infection ascertainment bias prior when the untraced group is omitted, against the posterior density obtained when fitting the incidence rate model when the untraced group is omitted.

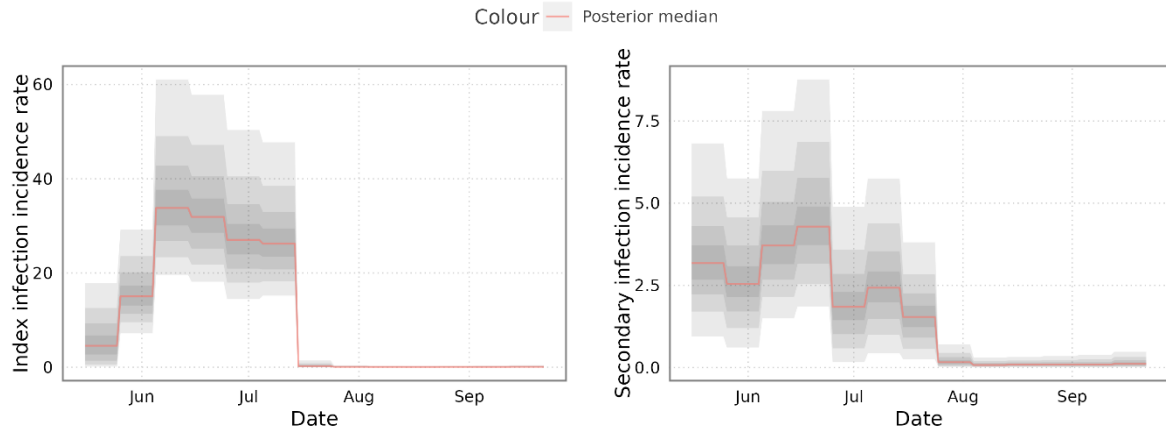

Supplementary Figure 14: Expected incidence rate over time for the two index and secondary subpopulations, when the untraced group is omitted. Each panel displays the estimate of the incidence rate over time for a different subpopulation. The central red line displays the posterior median, and the grey shaded areas display the uncertainty in the estimate, with the lightest region displaying the 90% credible intervals. We estimate the incidence for 10-day intervals, which results in step changes in the incidence.

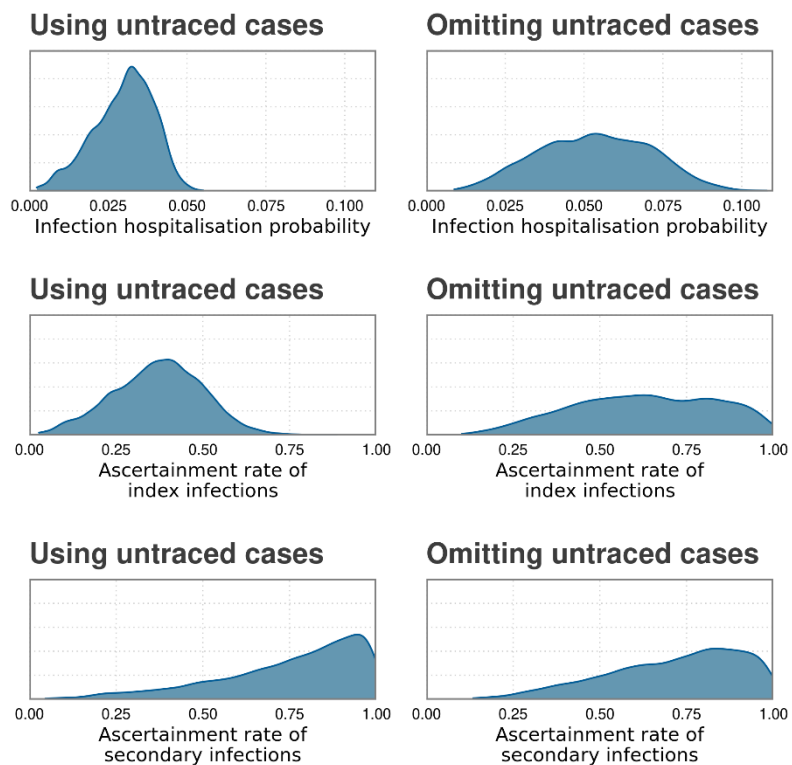

Supplementary Figure 15: Comparison of prior densities for key parameters when untraced cases are included (left) or excluded (right).

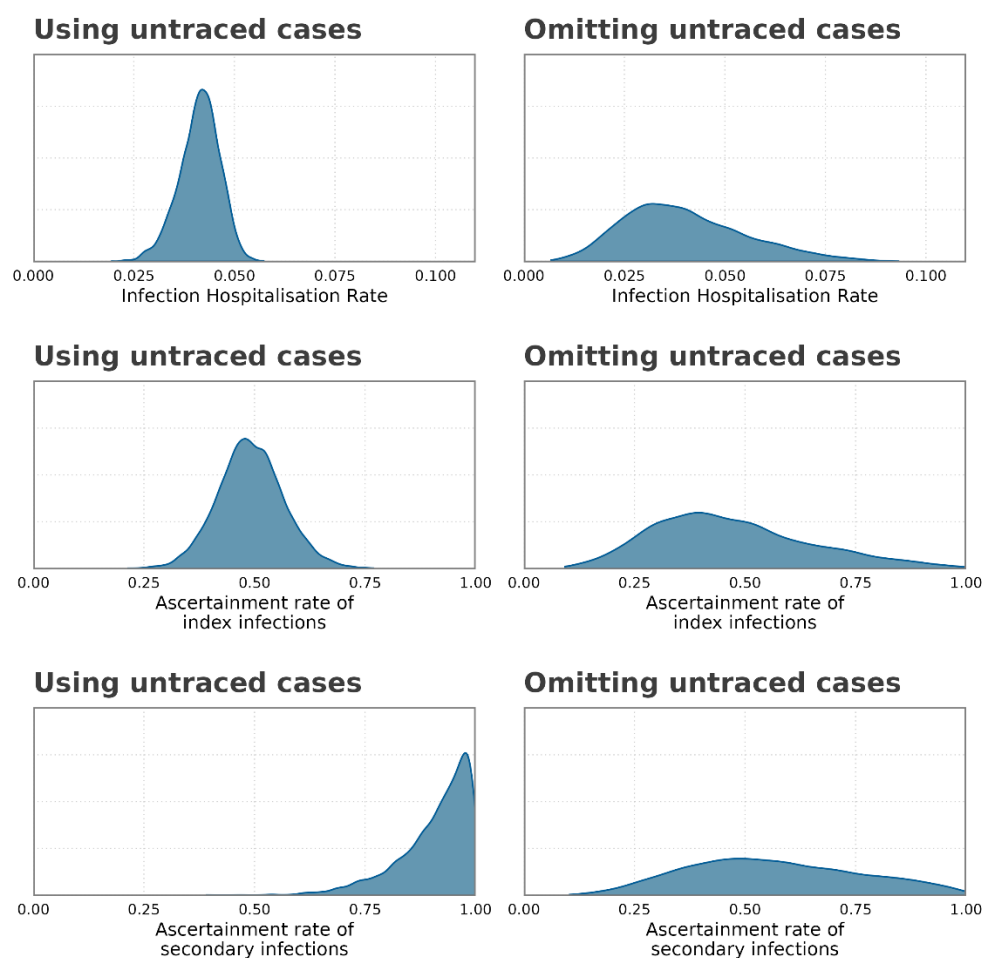

Supplementary Figure 16: Comparison of posterior densities for key parameters of interest, when the model is fit with untraced cases included (left), and when the model is fit with untraced cases excluded (right).

|                                                               | No of cases | Mean age (SD) years | % Male<br>(Count/Total Count) | % GBMSM<br>(Count/Total Count) |
|---------------------------------------------------------------|-------------|---------------------|-------------------------------|--------------------------------|
| All mpox cases during the study period                        | 3,375       | 37.9 (10.2)         | 99.2 (3347/3375)              | 95.5 (1177/1232)               |
| All mpox cases with a hospital episode                        | 824         | 37.3 (10.3)         | 98.8 (814/824)                | 94.3 (348/369)                 |
| Mpox cases used to calculate length of stay                   | 155         | 36.3 (11.2)         | 96.8 (150/155)                | 92.2 (71/77)                   |
| Mpox cases used to calculate symptom onset to hospitalisation | 110         | 36.0 (11.3)         | 95.5 (105/110)                | 90.6 (58/64)                   |
| Mpox cases used to calculate exposure to hospitalisation      | 8           | 32.9 (5.1)          | 100 (8/8)                     | 100 (8/8)                      |

Supplementary Table 11: The number of cases, the mean age of each study sample, the proportion of cases that were male and that identified as GBMSM.



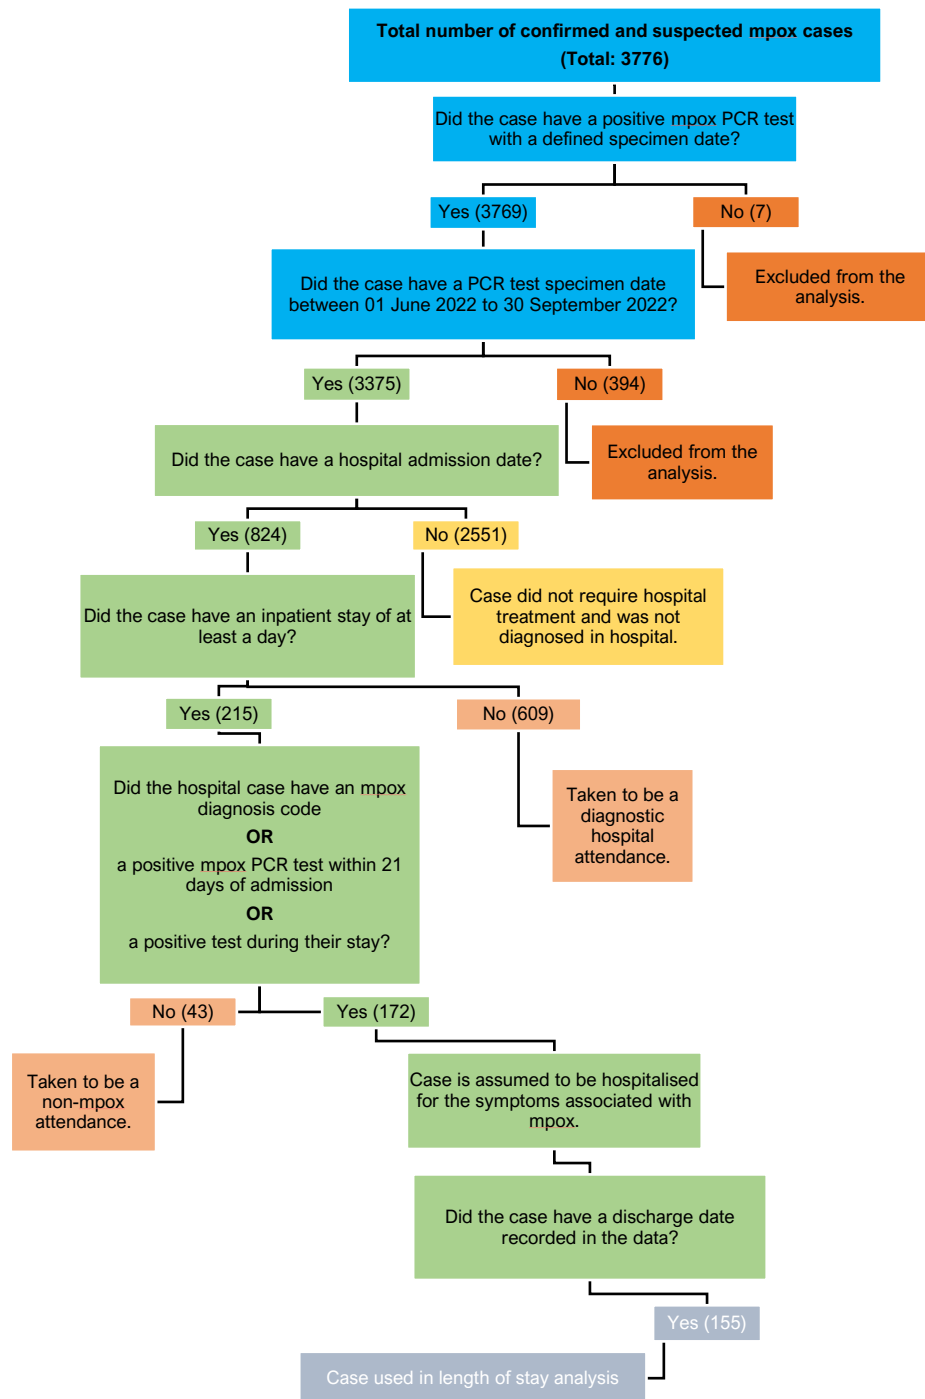

Supplementary Figure 17: A flow chart of the mpox data inclusion criteria.
